# Supplementary material for: Atomic structure of a nudivirus occlusion body protein determined from a 70-year-old crystal sample
Source: PubMed Central journal article supplement (PMC10345106; doi:10.1038/s41467-023-39819-1), 2023-07-13
Supplement: 41467_2023_39819_MOESM1_ESM.pdf [file 41467_2023_39819_MOESM1_ESM.pdf]

## Supplementary information

Atomic structure of a nudivirus occlusion body protein determined from a 70-year-old crystal sample.

**Jeremy R. Keown<sup>1</sup>, Adam D. Crawshaw<sup>2</sup>, Jose Trincao<sup>2</sup>, Loïc Carrique<sup>1</sup>, Richard J. Gildea<sup>2</sup>, Sam Horrell<sup>2</sup>, Anna J. Warren<sup>2</sup>, Danny Axford<sup>2</sup>, Robin Owen<sup>2</sup>, Gwyndaf Evans<sup>2</sup>, Annie Bézier<sup>3</sup>, Peter Metcalf<sup>4</sup>, Jonathan M. Grimes<sup>1</sup>**

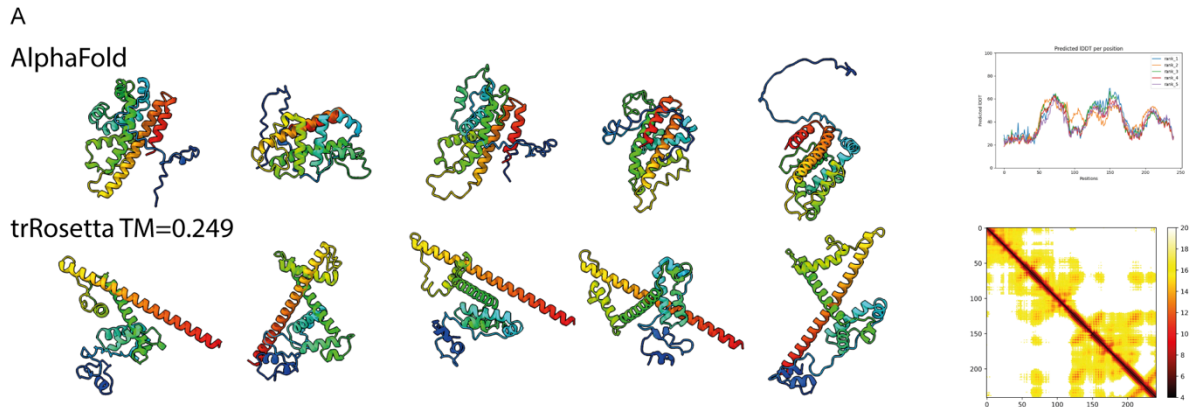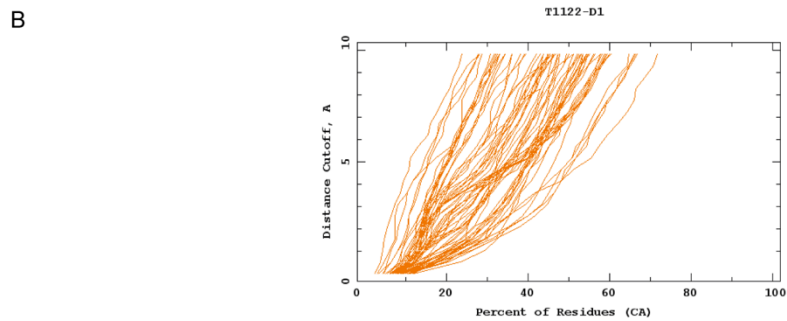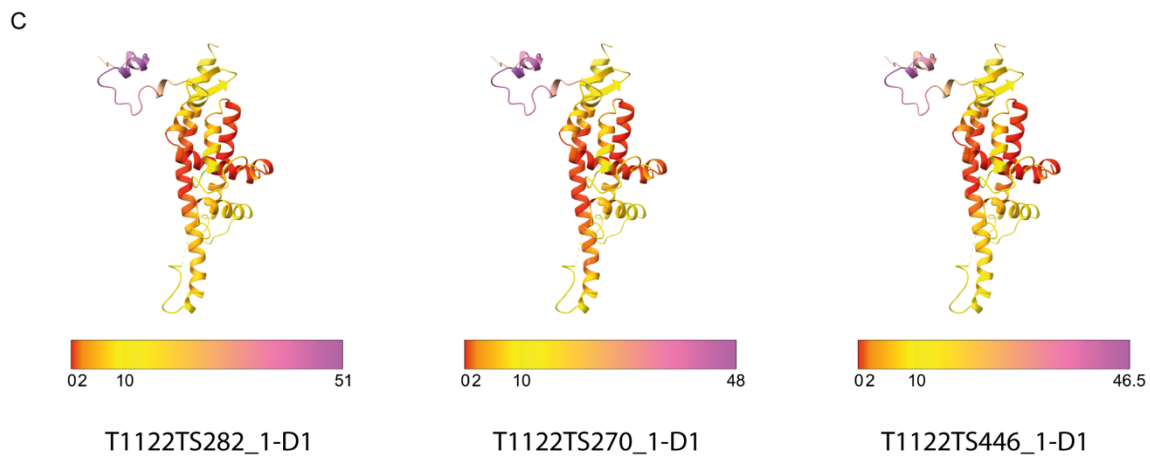

Supplementary Figure 1. **Nudivirus polyhedra predictions.** Structure prediction using AlphaFold or trRosetta for (A) ToNV (accession number: YP\_009116706.1). Five models were generated with each method and are coloured from the N- to C-terminus (blue-red). Plots and TM showing model quality are included for the prediction. (B) Overview from CASP15 (<https://predictioncenter.org/casp15/gdtplot.cgi?target=T1122-D1>) showing the percentage of residues within a given distance of their experimental location. (C) Three representative predicted models from CASP15 were aligned to the experimentally determined ToNV polyhedrin structure. The experimentally determined structure is shown and coloured according to the distance between the equivalent C $\alpha$  in the predicted model (RMSD, units of (Å)).

A

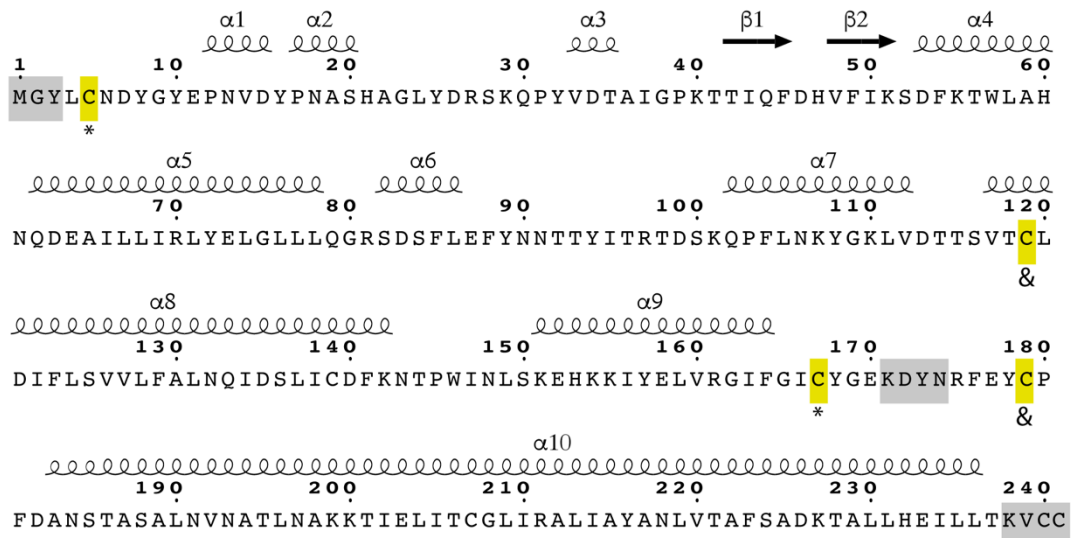

B

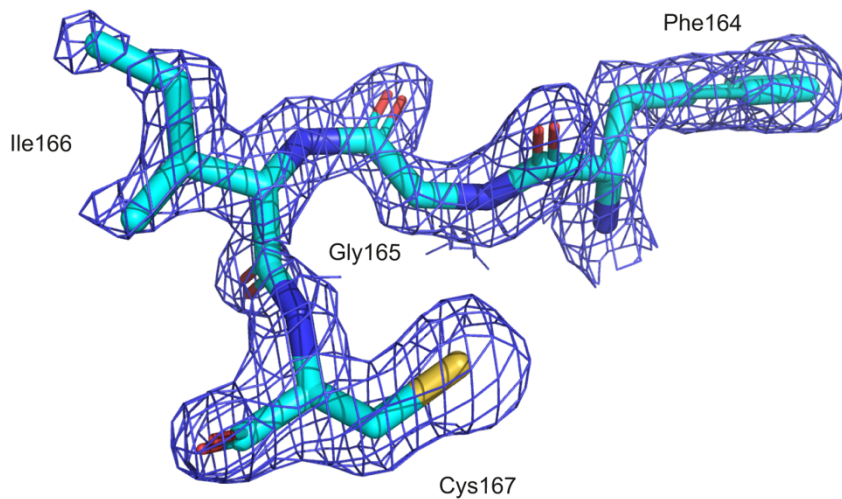

Supplementary Figure 2. **Annotation of secondary structure elements in the native ToNV OB.** ToNV\_Orf59 sequence annotated with the secondary structure elements present in the native ToNV polyhedrin (A). Pairs of cysteines are indicated with matching symbols. Residues not resolved in the electron density are indicated in grey. (B) Electron density and model showing the cis peptide between Gly165 and Ile166. Density is shown at  $2F_o - F_c$  map at  $1\sigma$  (blue).

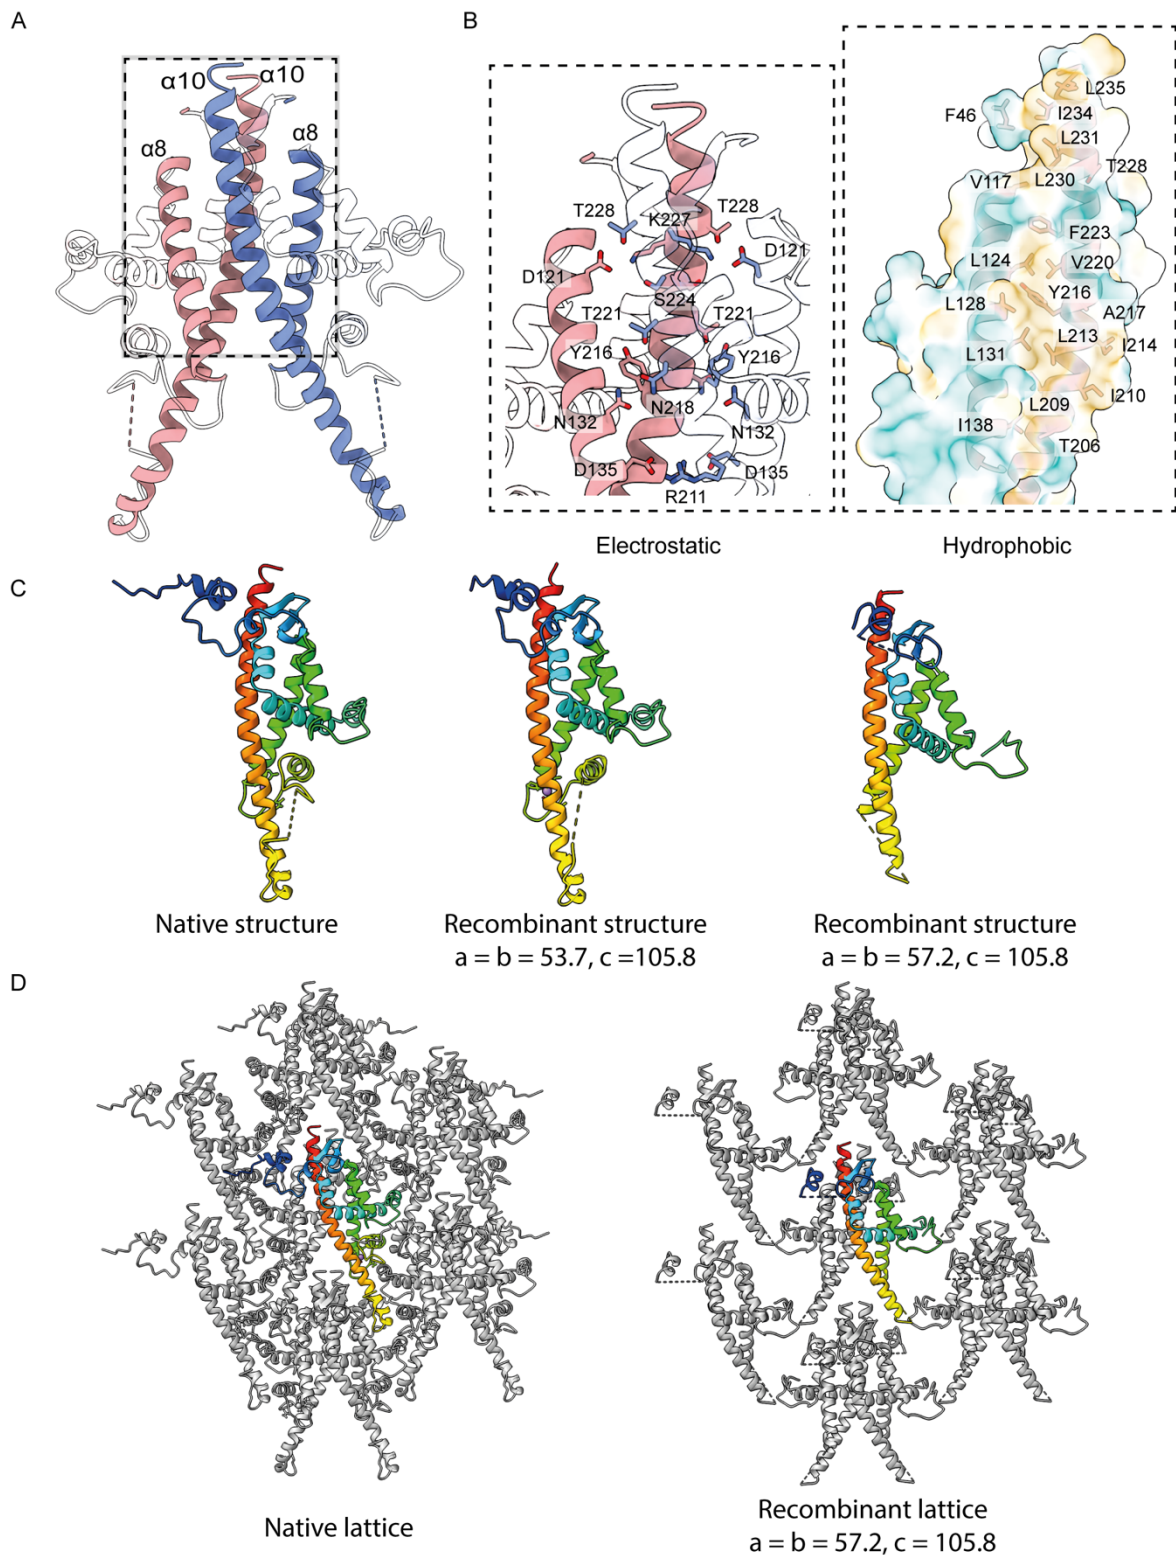

Supplementary Figure 3. **Lattice properties of the ToNV polyhedra.** (A/B) The two polyhedrin molecules are shown with the residues which mediate the interface shown. Regions outside of the interface have been removed or made transparent for clarity. Residues which interact with the adjacent protomer are shown as sticks and grouped according to whether they participate in electrostatic or hydrophobic interactions across the interface. (C) Integrity of the native or two different recombinant polyhedrin structures. Coloured from the N-terminus (blue) to C-terminus (red). (D) Comparison of lattices between the native and expanded recombinant lattices.

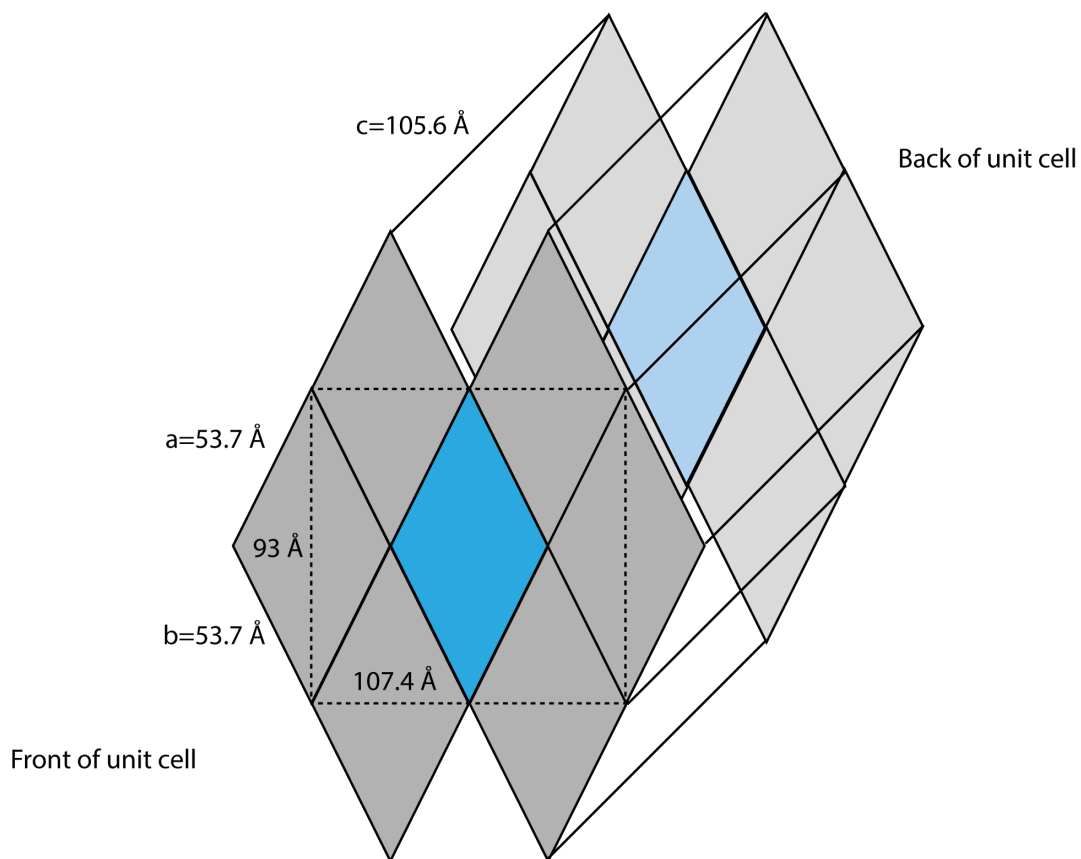

Supplementary Figure 4. **Alternative index of the lattice.** The  $P32_12$  unit cell (shown in shades of blue) has unit cell dimensions of  $a = b = 53.7 \text{ \AA}$  and  $c = 105.6 \text{ \AA}$ . The front and back of neighbouring unit cells are shown in shades of grey. By indexing the crystal differently, we can generate an orthorhombic lattice that has close to equal unit cell dimensions of  $a = 93 \text{ \AA}$ ,  $b = 107.4$ , and  $c = 105.6$ .

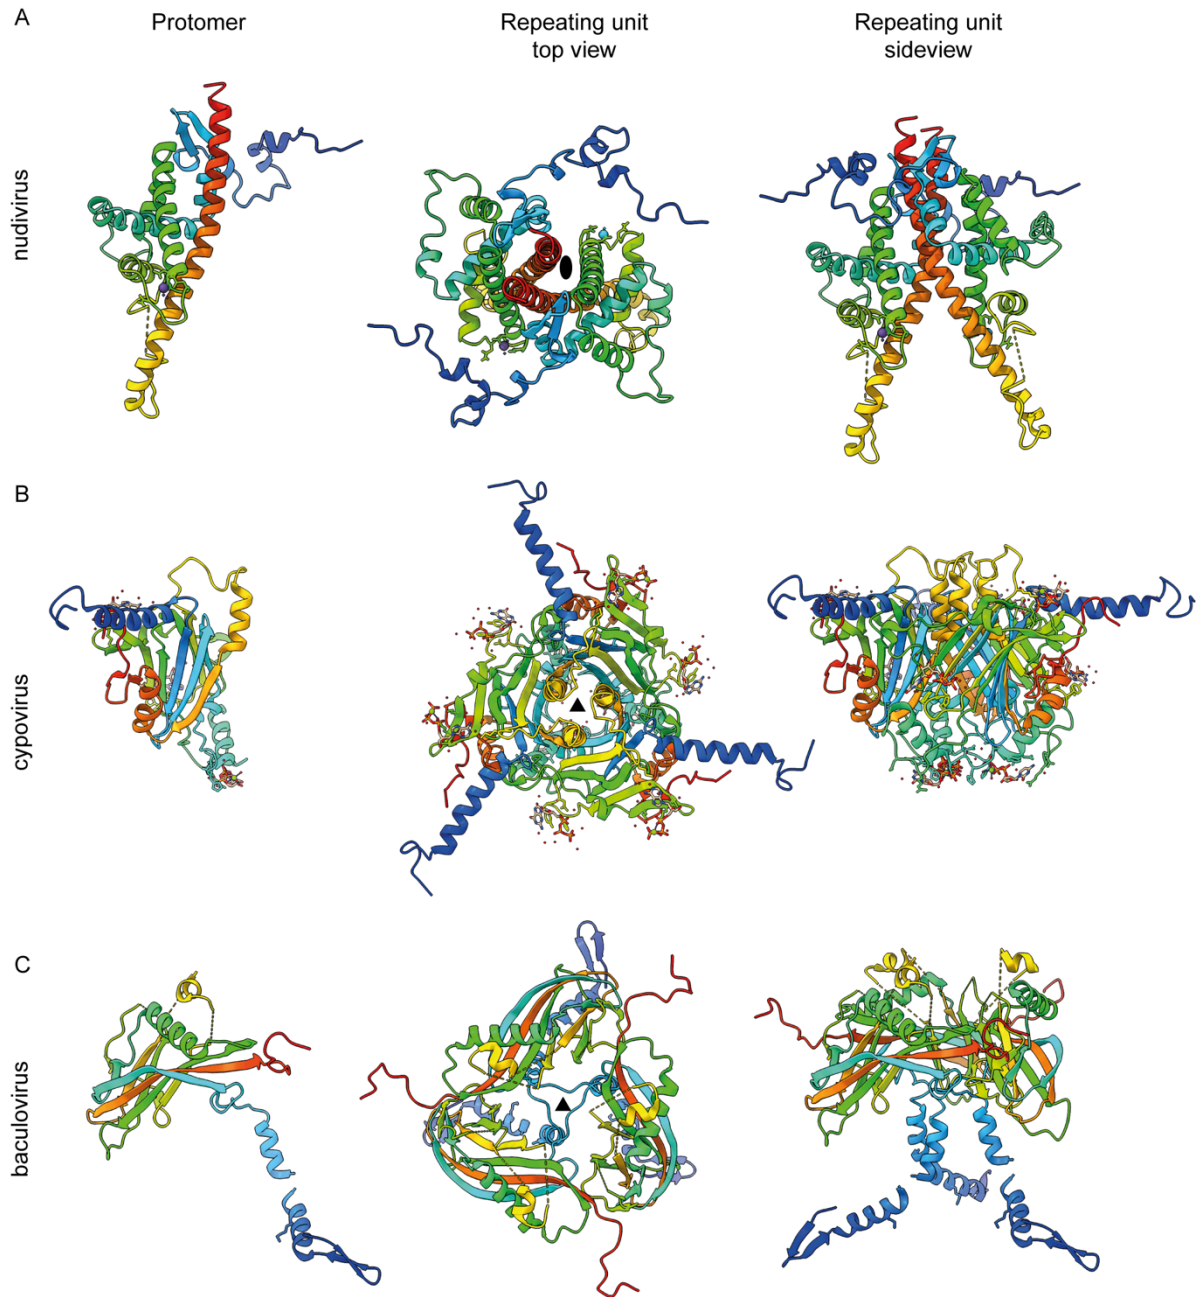

Supplementary Figure 5. **Examples of viral polyhedrin.** Polyhedrin structure of the protomer or repeating unit for (A) *Nudiviridae*, (B) *Baculoviridae* (PDB ID: 3JVB from *Wiseana signata* nucleopolyhedrovirus), and (C) cypovirus (PDB ID: 2OH5 from *Bombyx mori* cypovirus 1). The models are coloured from N-terminus (blue) to C-terminus (red). Nucleotides and waters are shown as sticks and spheres, respectively.

|                               | <b>Native ToNV OB</b>      | <b>Recombinant ToNV OB</b> | <b>Recombinant ToNV OB-Expanded cell</b> | <b>SeMet Recombinant ToNV OB</b> |
|-------------------------------|----------------------------|----------------------------|------------------------------------------|----------------------------------|
| Beamline                      | DLS VMXm                   | DLS I24                    | DLS I24                                  | DLS VMXm                         |
| Number of crystals            | 16                         | 289                        | 10                                       | 55                               |
| Wavelength (Å)                | 0.6328                     | 1.5498                     | 1.5498                                   | 0.9787                           |
| Resolution range (Å)          | 28.0-1.69 (1.75-1.69)      | 46.57-1.96 (2.03-1.96)     | 44.87-2.8 (2.9-2.8)                      | 34.77-1.91 (1.98-1.91)           |
| Space group                   | <i>P</i> 3 <sub>2</sub> 21 | <i>P</i> 3 <sub>2</sub> 21 | <i>P</i> 3 <sub>2</sub> 21               | <i>P</i> 3 <sub>2</sub> 21       |
| Unit cell (a,b,c) (Å)         | 53.4, 53.4, 105.6          | 53.8, 53.8, 105.8          | 57.2, 57.2, 105.8                        | 53.5, 53.5, 105.3                |
| Unique reflections            | 19056 (1962)               | 13279 (1297)               | 4961 (478)                               | 13277 (1129)                     |
| Multiplicity                  | 19.6 (15.9)                | 160.7 (21.5)               | 3.0 (2.9)                                | 51.7 (2.9)                       |
| Completeness (%)              | 94.0 (99.6)                | 100 (99.6)                 | 93.8 (93.7)                              | 93.9 (79.7)                      |
| $\langle I/\sigma(I) \rangle$ | 9.9 (1.9)                  | 16.0 (0.9)                 | 6.4 (2.3)                                | 24.6 (2.6)                       |
| Wilson B-factor               | 16.1                       | 28.1                       | 45.1                                     | 17.7                             |
| $R_{pim}$                     | 0.18 (2.38)                | 0.040 (2.309)              | 0.15 (0.49)                              | 0.035 (0.74)                     |
| CC <sub>1/2</sub>             | 0.97 (0.32)                | 0.99 (0.53)                | 0.96 (0.28)                              | 0.95 (0.28)                      |
| CC*                           | 0.99 (0.70)                | 1 (0.83)                   | 0.99 (0.66)                              | 0.99 (0.66)                      |
| Anomalous slope               |                            |                            |                                          | 2.125                            |
| $R_{work}$                    | 0.18 (0.29)                | 0.18 (0.28)                | 0.25 (0.28)                              | 0.17 (0.24)                      |
| $R_{free}$                    | 0.21 (0.30)                | 0.23 (0.36)                | 0.27 (0.30)                              | 0.22 (0.35)                      |
| CC <sub>work</sub>            | 0.96 (0.79)                | 0.95 (0.81)                | 0.90 (0.74)                              | 0.95 (0.68)                      |
| CC <sub>free</sub>            | 0.95 (0.77)                | 0.94 (0.77)                | 0.88 (0.69)                              | 0.89 (0.69)                      |
| No. of atoms                  |                            |                            |                                          |                                  |
| Macromolecules                | 1839                       | 1722                       | 1260                                     | 1707                             |
| Ligands (Ca)                  | 1                          | 1                          | -                                        | 1                                |
| Solvent                       | 125                        | 70                         | 12                                       | 101                              |
| Protein residues              | 230                        | 215                        | 161                                      | 213                              |
| R.m.s.d., bond lengths (Å)    | 0.005                      | 0.004                      | 0.006                                    | 0.005                            |
| R.m.s.d., bond angles (°)     | 0.66                       | 0.64                       | 0.77                                     | 0.77                             |
| Ramachandran                  |                            |                            |                                          |                                  |
| Favoured (%)                  | 97.8                       | 97.2                       | 95.4                                     | 98.1                             |
| Allowed (%)                   | 2.2                        | 2.8                        | 4.6                                      | 1.9                              |
| Outliers (%)                  | 0                          | 0                          | 0                                        | 0                                |
| Average B-factor              |                            |                            |                                          |                                  |
| Overall                       | 18.4                       | 36.1                       | 38.4                                     | 21.6                             |
| Macromolecules                | 18.0                       | 36.0                       | 38.5                                     | 21.2                             |
| Ligands (Ca)                  | 14.7                       | 30.3                       | -                                        | 16.9                             |
| Solvent                       | 24.2                       | 38.7                       | 33.8                                     | 29.1                             |
| PDB ID                        | 8BBT                       | 8BCK                       | 8BCL                                     | 8BC5                             |

Supplementary table 1. **Data collection and refinement statistics. Values in parentheses are for the high resolution shell.**
